# Supplementary material for: Typhoid Fever in Chile 1969–2012: Analysis of an Epidemic and Its Control
Source: PubMed Central journal article supplement (PMC6128366; doi:10.4269/ajtmh.18-0125), 2018-07-25
Supplement: tpmd180125.SD1.pdf [file tpmd180125.SD1.pdf]

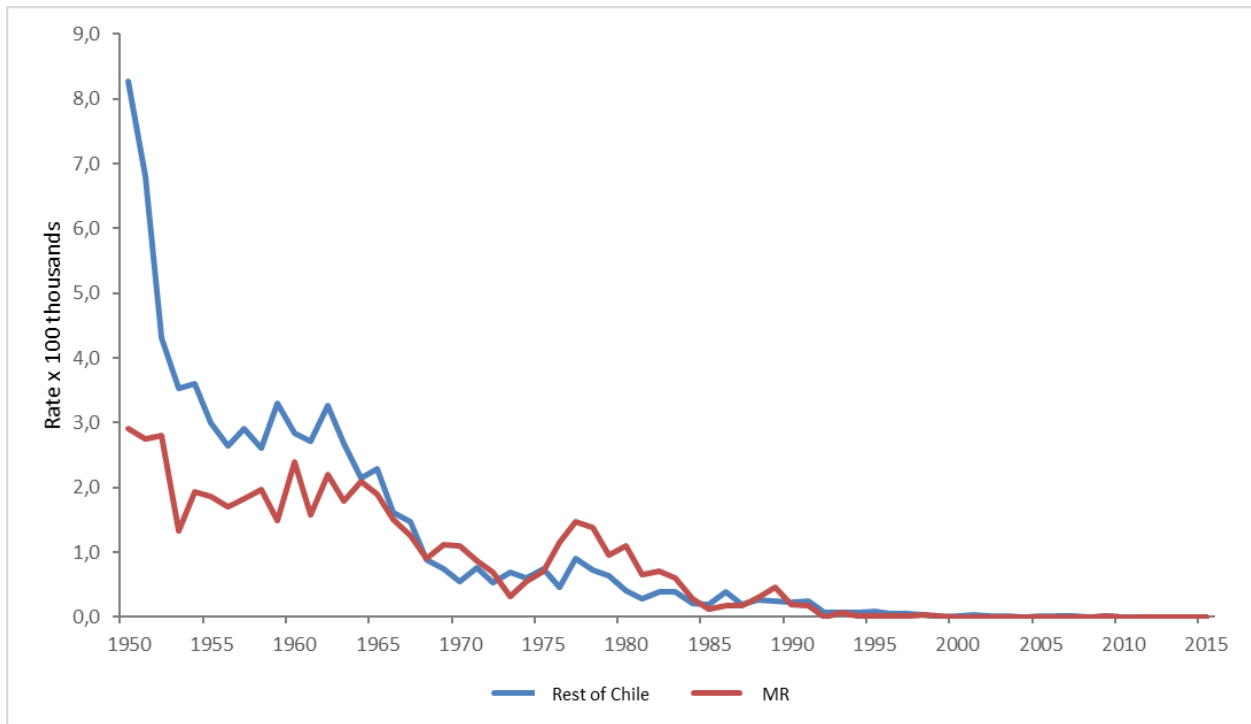

Supplementary Figure 1 Typhoid fever mortality in the Metropolitan Region and rest of Chile, 1950-2012.

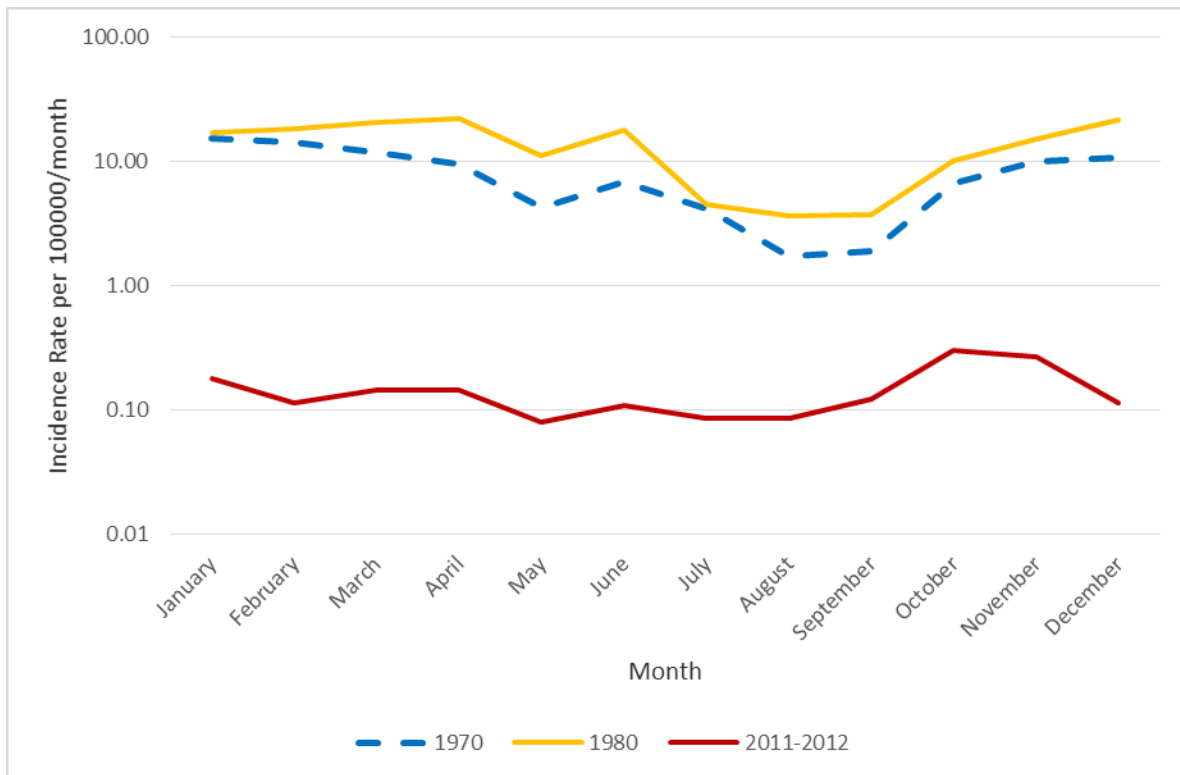

Supplementary Figure 2 Seasonality of Typhoid Fever before, during and after the epidemic. (1970-1977-2011) Monthly Incidence rates.

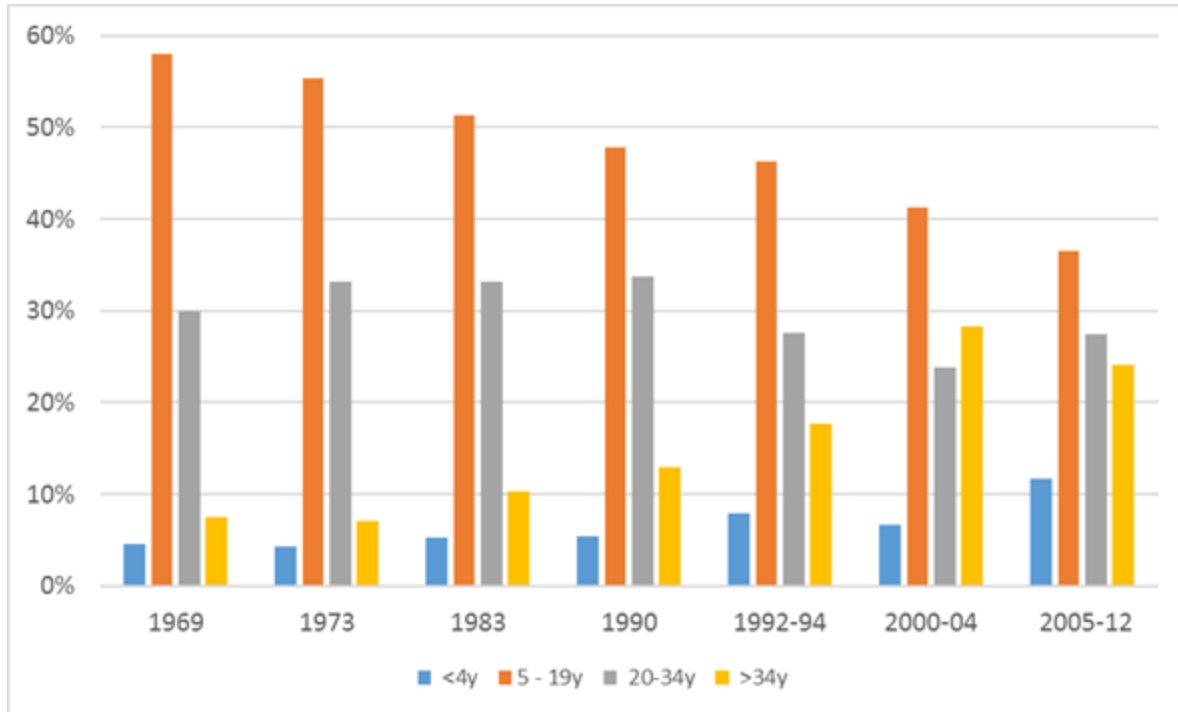

Supplementary Figure 3 Age distribution of TF cases in the MR.

Supplementary Table 1

**Drop in the Incidence Rate of Typhoid Fever between Study Periods by Age Groups 1969 To 2012**

| Age group (years) | 1983 to 2005-2012 |                  | 1969 to 2005-2012 |                   |
|-------------------|-------------------|------------------|-------------------|-------------------|
|                   | TF IR Reduction*  | 95% Conf Interv* | TF IR Reduction** | 95% Conf Interv** |
| 0-4               | 66.5              | 51.3-86.3        | 25.1              | 18.8-33.6         |
| 5-19              | 241.1             | 209.4-277.6      | 115.8             | 100.2-133.9       |
| 20-34             | 238.0             | 202.2-280.2      | 120.8             | 101.8-143.3       |
| 35 and over       | 129.4             | 107.9-154.9      | 50.9              | 41.3-62.8         |

\*: times of reduction in the TF IR at the end of the study period with respect to the epidemic period, \*\* times of reduction in the TF IR at the end of the study period with respect to the endemic period.

THE POISSON MODEL FOR AGE-PERIOD EFFECT ON TF IR

Poisson regression

Number of obs = 12  
 LR chi2(11) = 57624.43  
 Prob > chi2 = 0.0000  
 Pseudo R2 = 0.9983

Log likelihood = -48.144249

| Casos           | IRR      | Std. Err.  | z      | P> z  | [95% Conf. Interval] |          |
|-----------------|----------|------------|--------|-------|----------------------|----------|
| Edadcat         |          |            |        |       |                      |          |
| 5_19            | 4.567149 | .3798527   | 18.26  | 0.000 | 3.880165             | 5.375764 |
| 20_34           | 3.535312 | .3039071   | 14.69  | 0.000 | 2.987141             | 4.184079 |
| 35_80           | .7005245 | .0712584   | -3.50  | 0.000 | .5739021             | .8550841 |
| periodo         |          |            |        |       |                      |          |
| 2               | 2.64761  | .2419087   | 10.66  | 0.000 | 2.213507             | 3.166848 |
| 3               | .0397908 | .0059067   | -21.72 | 0.000 | .029746              | .0532276 |
| Edadcat#periodo |          |            |        |       |                      |          |
| 5_19#2          | .7863443 | .074829    | -2.53  | 0.012 | .6525471             | .947575  |
| 5_19#3          | .2170249 | .036001    | -9.21  | 0.000 | .1567866             | .3004072 |
| 20_34#2         | .7443192 | .0730695   | -3.01  | 0.003 | .6140406             | .9022384 |
| 20_34#3         | .2080529 | .0358173   | -9.12  | 0.000 | .1484689             | .2915494 |
| 35_80#2         | .9587374 | .1104932   | -0.37  | 0.715 | .7648915             | 1.20171  |
| 35_80#3         | .493313  | .090279    | -3.86  | 0.000 | .3446258             | .7061504 |
| _cons           | .0003972 | .0000318   | -97.81 | 0.000 | .0003395             | .0004647 |
| ln(POB)         | 1        | (exposure) |        |       |                      |          |

Note: \_cons estimates baseline incidence rate.

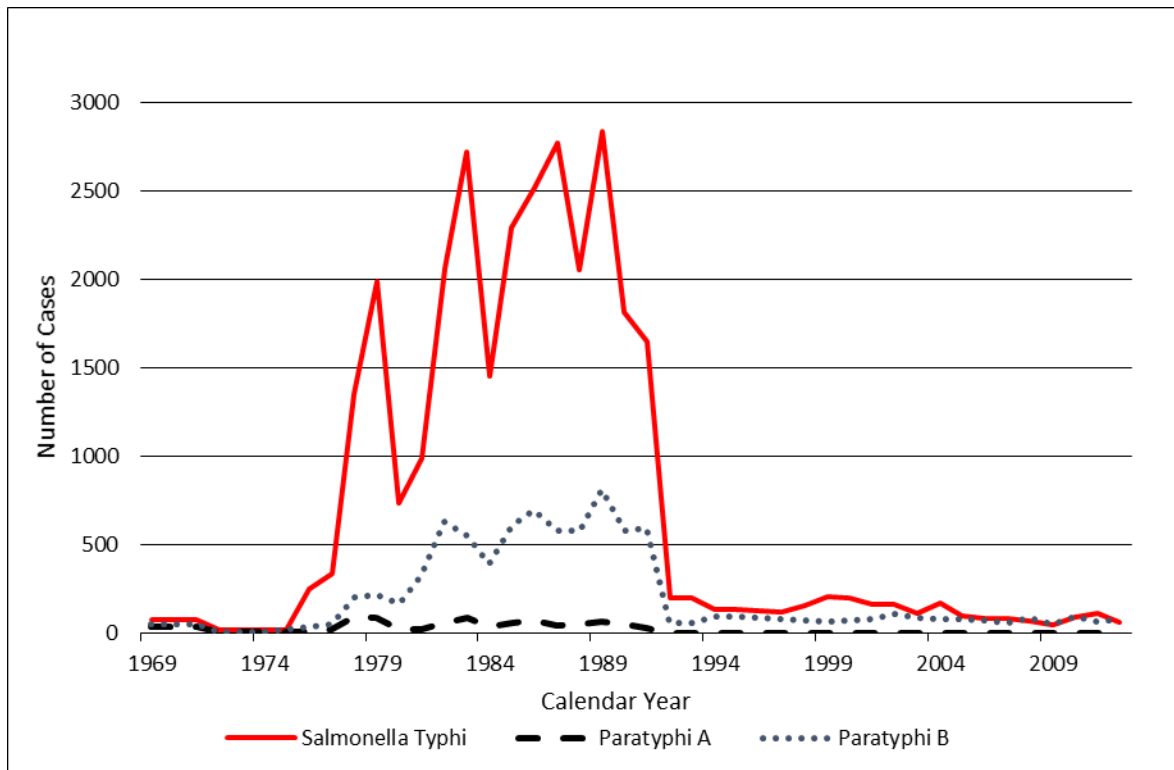

Supplementary Figure 4 Number of Salmonella enterica serovar Tyhpi, Paratyphi A and Paratyphi B isolated in Chile 1969-2012.

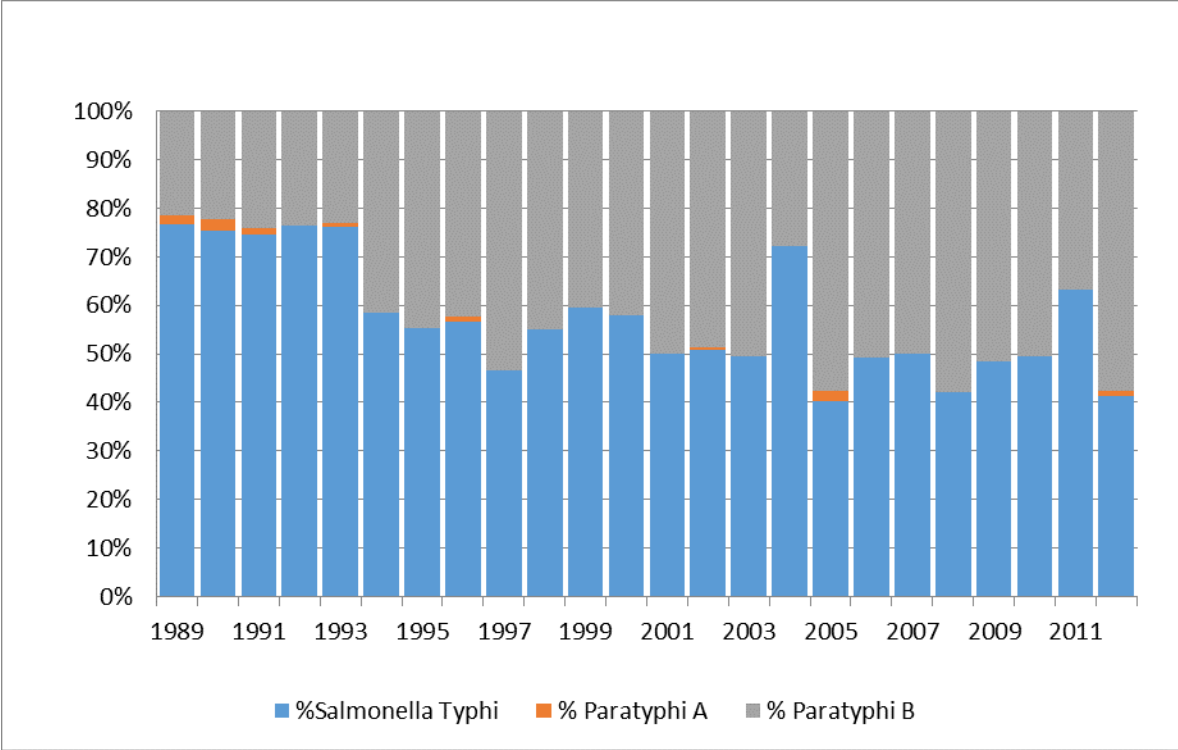

Supplementary Figure 5 Relative weight of Salmonella enterica serovar Typhi, Paratyphi A and Paratyphi B among TF cases in the Metropolitan Region 1989-2012

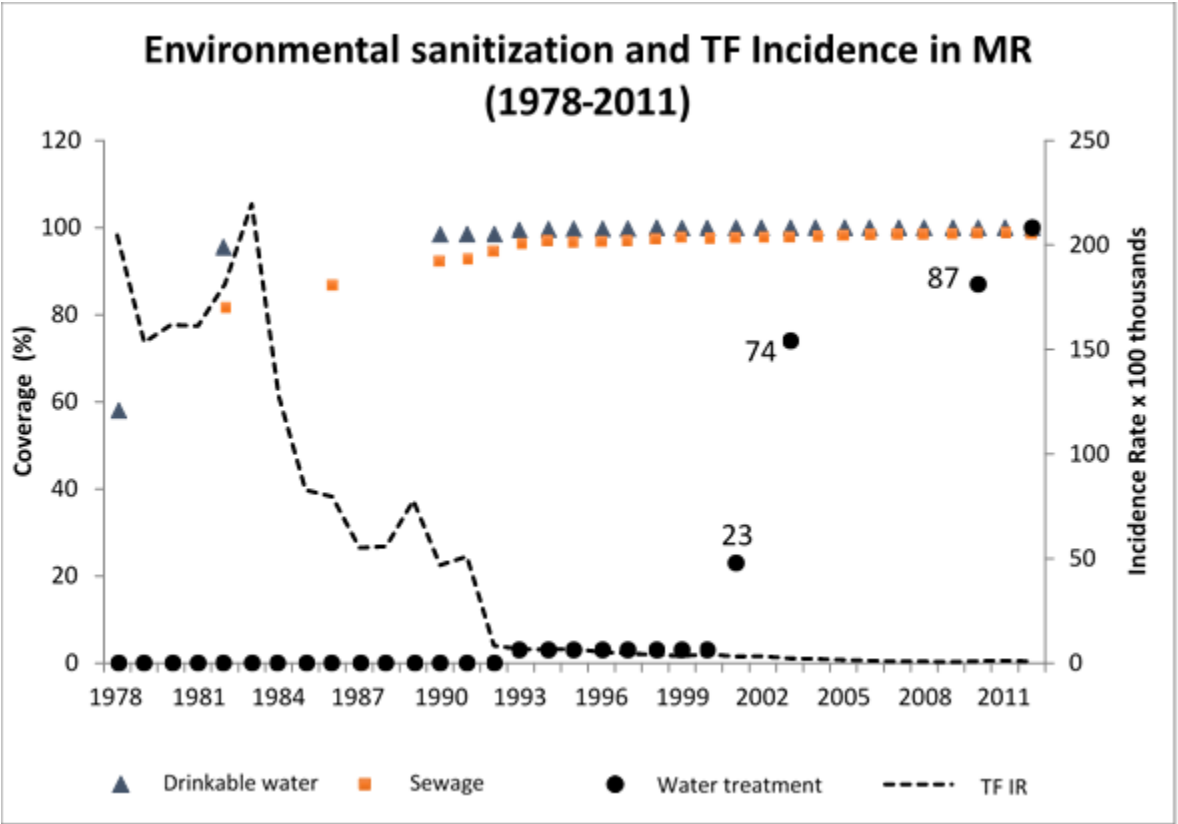

Supplementary Figure 6 Environmental Sanitation and Typhoid Fever incidence in the MR 1978-2012

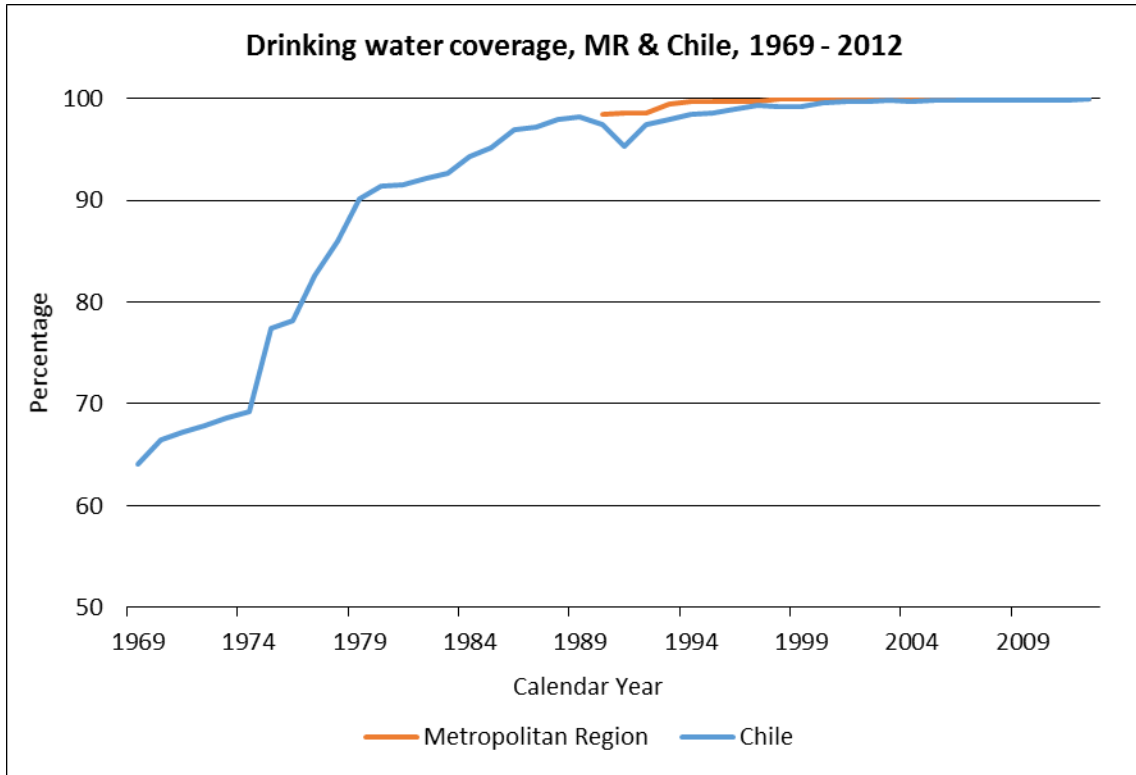

Supplementary Figure 7. Drinking water coverage in the Metropolitan Region and all of Chile 1969-2012.

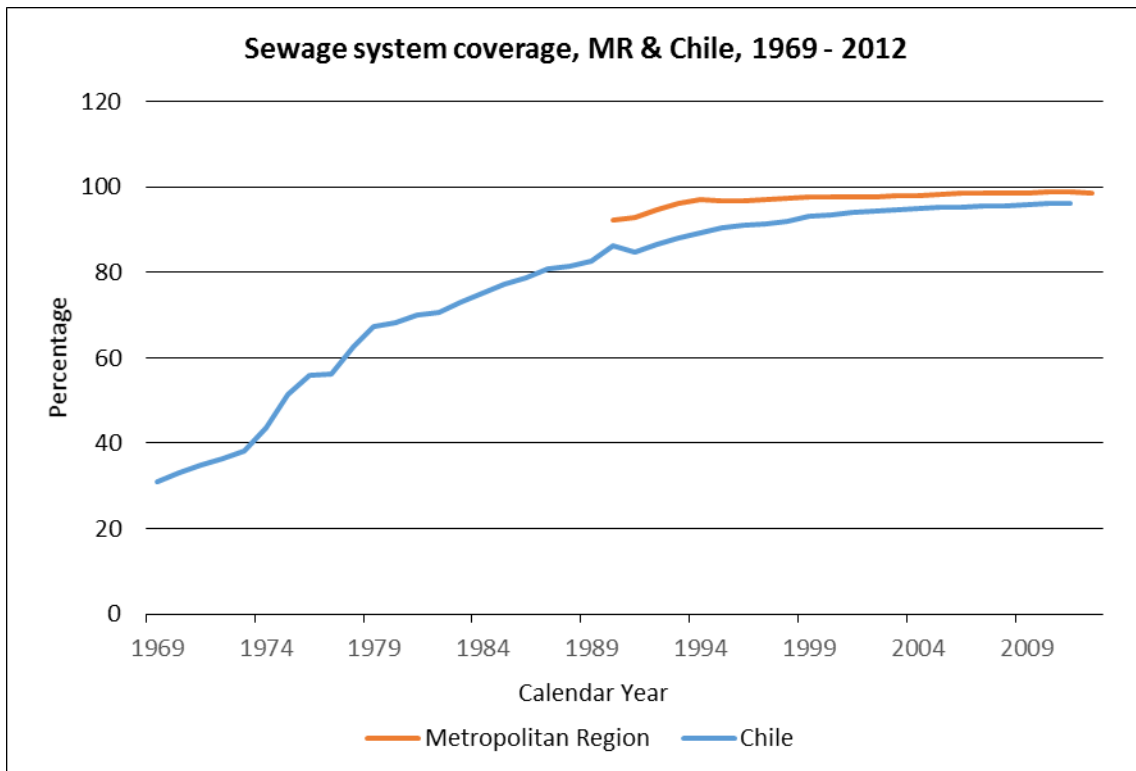

Supplementary Figure 8. Sewage system coverage in the Metropolitan Region and all of Chile 1969-2012.

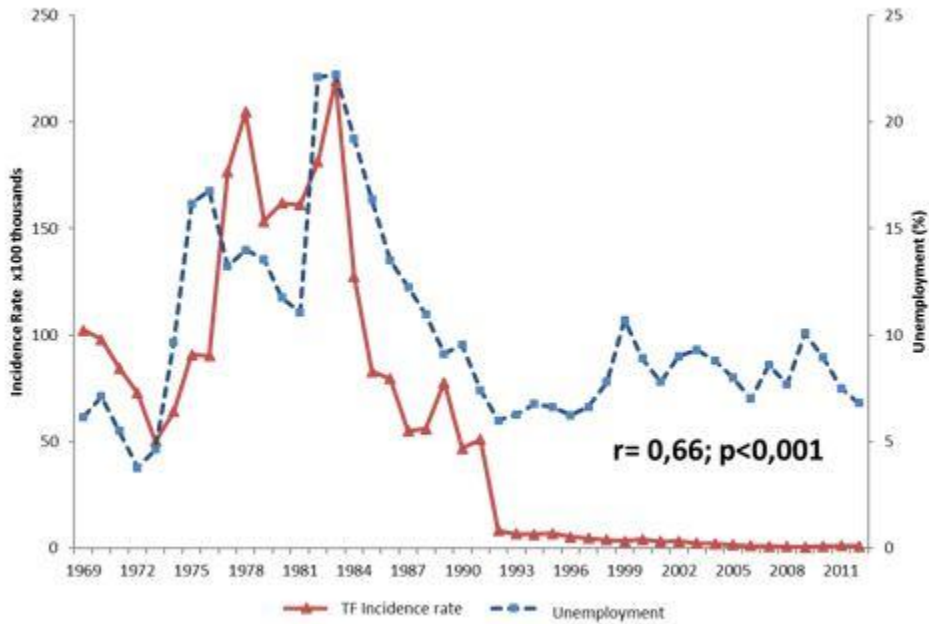

Supplementary Figure 9. Unemployment and Typhoid Fever Incidence in the Metropolitan Region of Chile 1969-2012.

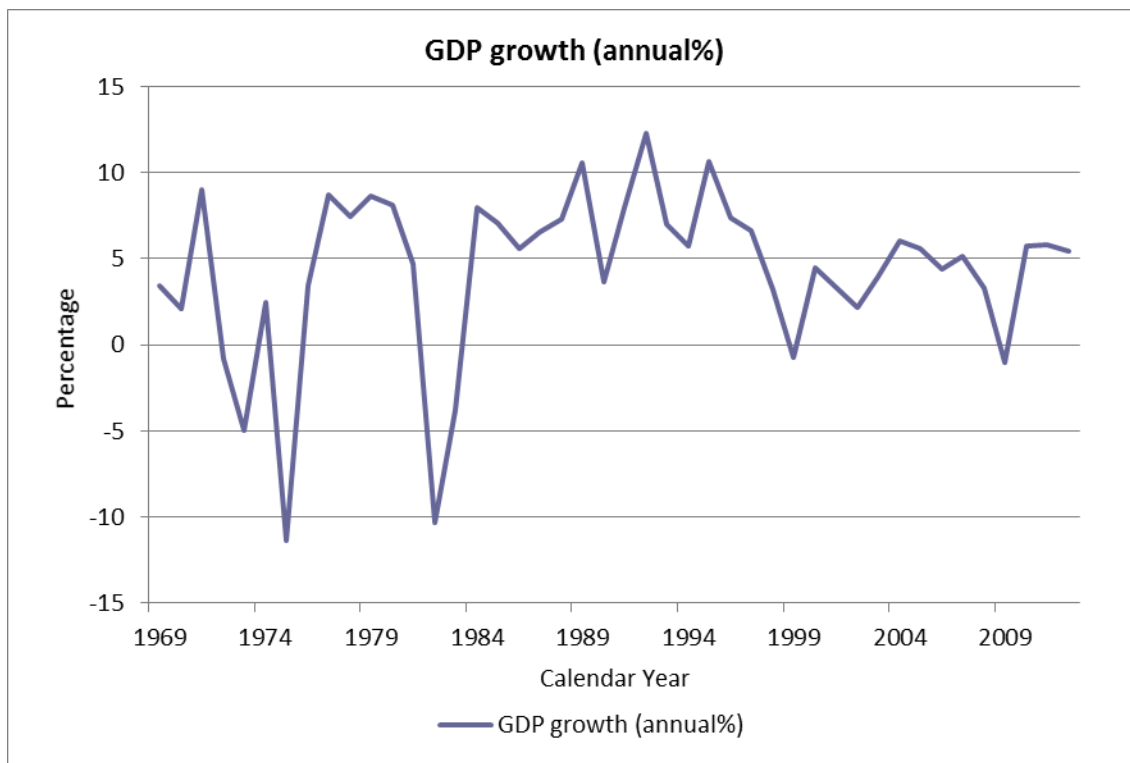

Supplementary Figure 10. GDP in the Metropolitan Region of Chile 1969-2012

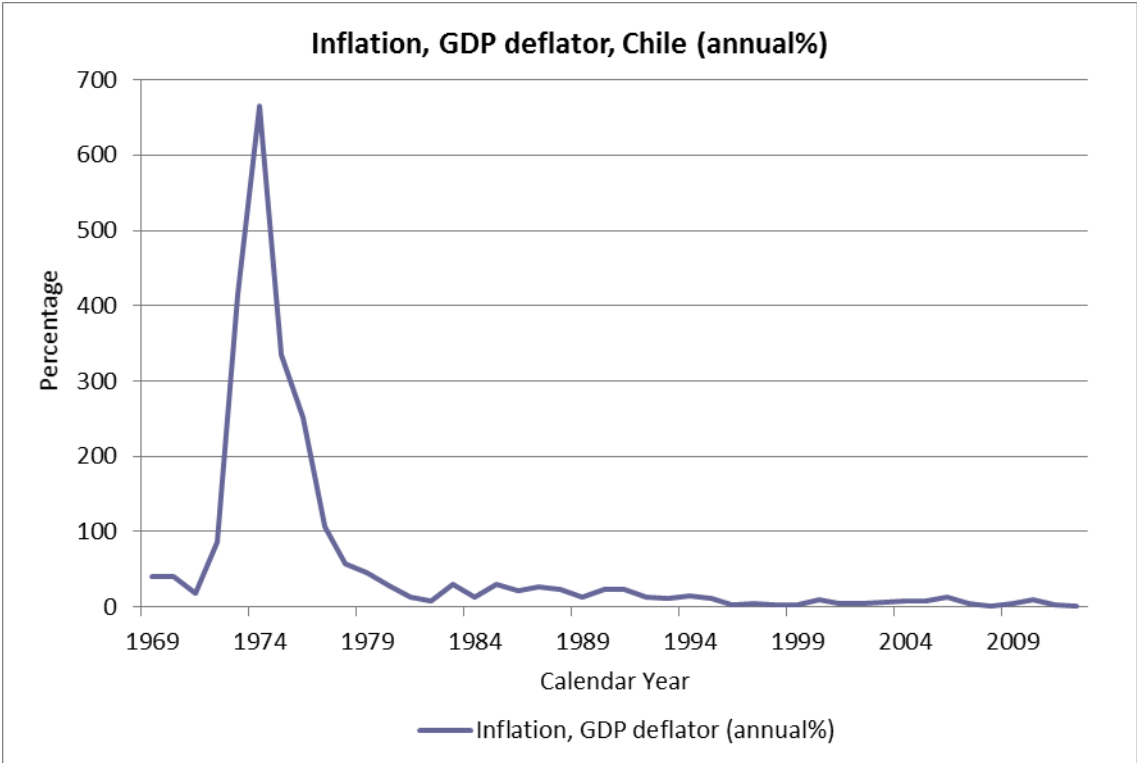

Supplementary Figure 11. Inflation, GDP deflator in Chile 1969-2012

### Residuals plot

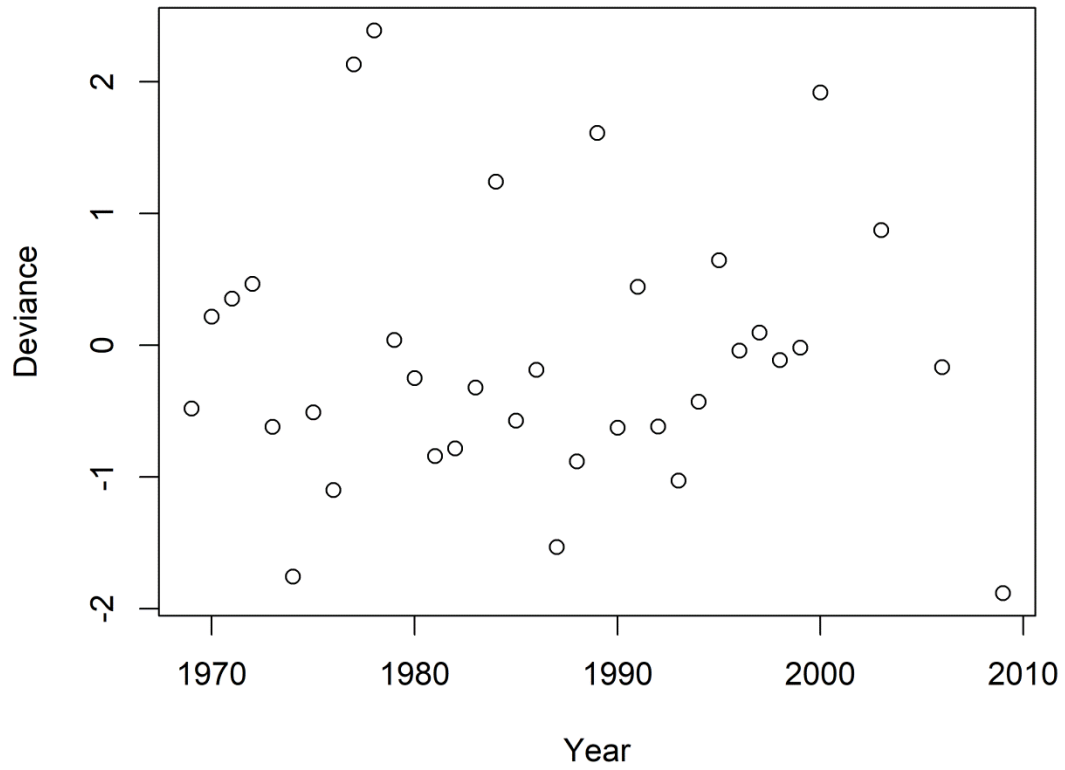

Supplementary Figure 12. Residuals of the selected ITS model for Typhoid Fever interventions. Metropolitan Region of Chile 1969-2010



### ACF over model 1 residuals

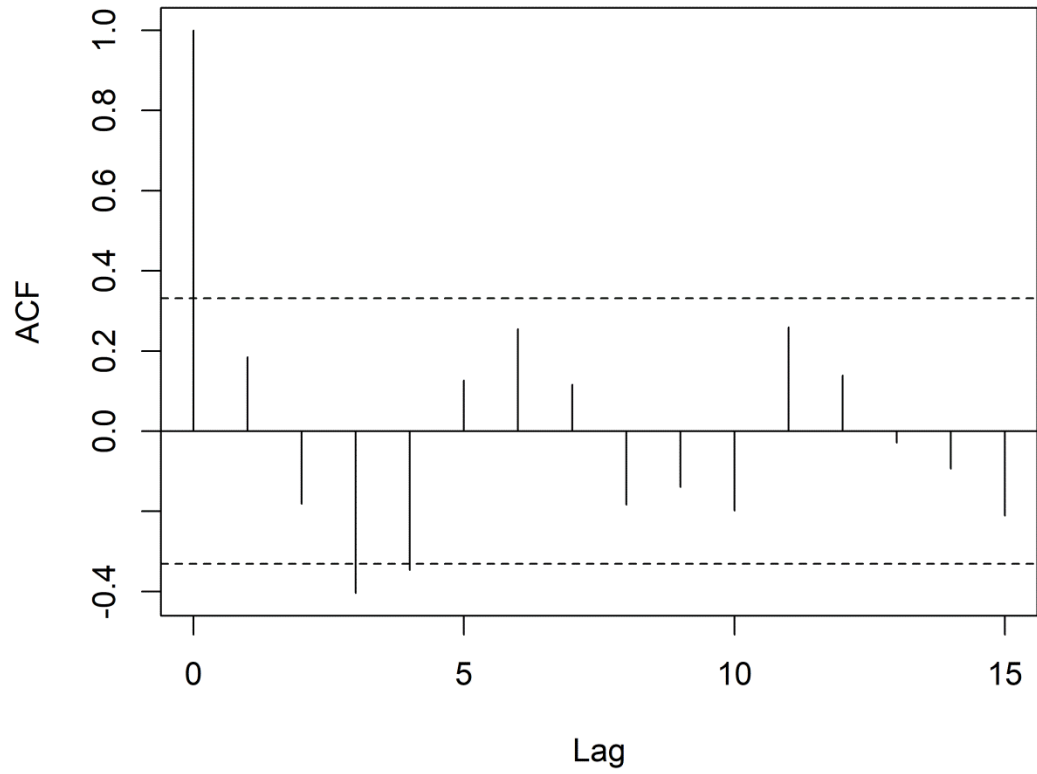

Supplementary Figure 13. Autocorrelation function (ACF) of residuals of the selected model for Typhoid Fever trend and effect of intervention

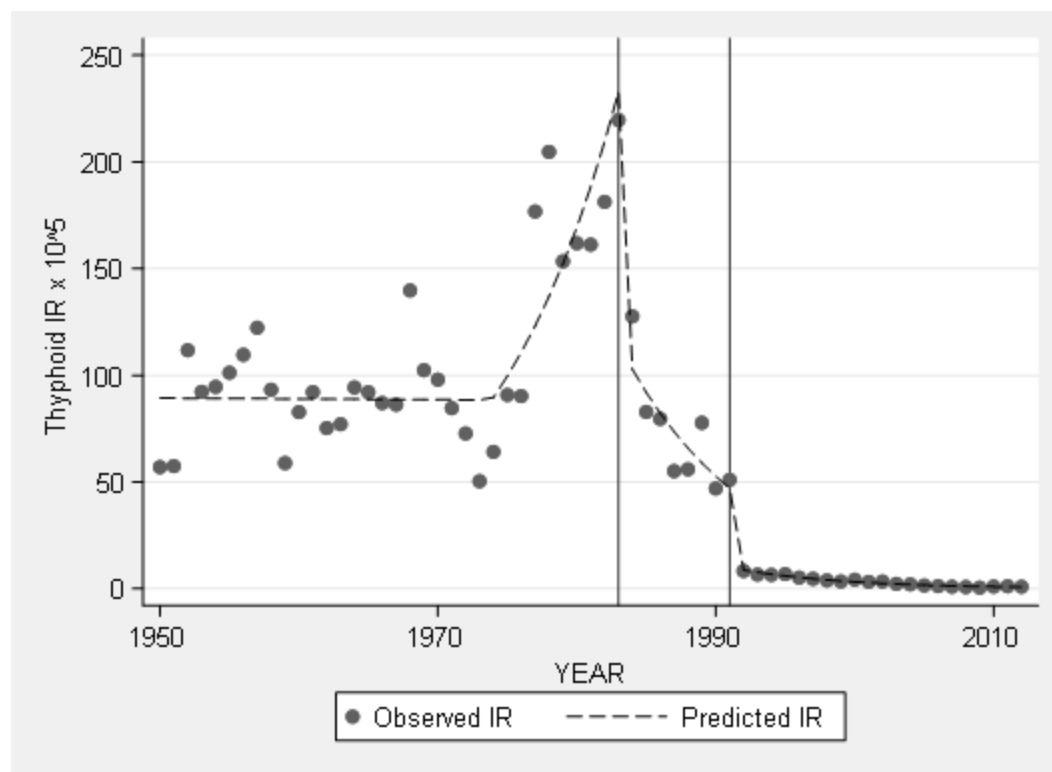

Supplementary Figure 14. ITS Model since 1950; this is new, sent today by email

**SUPPLEMENTARY TABLE 2:  
 FITTED PARAMETERS WITH THE ITS MODELS USING 1950-2012  
 AND 1969-2012 TYPHOID FEVER INCIDENCE RATE DATA. MR**

| Year | Predicted Rates, per 100,000 |               | Predicted Cases, number |               |
|------|------------------------------|---------------|-------------------------|---------------|
|      | ITS 1950-2012                | ITS 1969-2012 | ITS 1950-2012           | ITS 1969-2012 |
| 1950 | 89,3                         |               | 1567                    |               |
| 1951 | 89,2                         |               | 1625                    |               |
| 1952 | 89,2                         |               | 1683                    |               |
| 1953 | 89,2                         |               | 1741                    |               |
| 1954 | 89,1                         |               | 1799                    |               |
| 1955 | 89,1                         |               | 1857                    |               |
| 1956 | 89,1                         |               | 1932                    |               |
| 1957 | 89,0                         |               | 2007                    |               |
| 1958 | 89,0                         |               | 2082                    |               |
| 1959 | 89,0                         |               | 2157                    |               |
| 1960 | 88,9                         |               | 2233                    |               |
| 1961 | 88,9                         |               | 2317                    |               |
| 1962 | 88,9                         |               | 2402                    |               |
| 1963 | 88,8                         |               | 2486                    |               |
| 1964 | 88,8                         |               | 2571                    |               |
| 1965 | 88,8                         |               | 2655                    |               |

|      |       |       |       |       |
|------|-------|-------|-------|-------|
| 1966 | 88,7  |       | 2740  |       |
| 1967 | 88,7  |       | 2826  |       |
| 1968 | 88,7  |       | 2911  |       |
| 1969 | 88,6  | 111,8 | 2996  | 3780  |
| 1970 | 88,6  | 94,2  | 3081  | 3278  |
| 1971 | 88,5  | 79,4  | 3147  | 2823  |
| 1972 | 88,5  | 66,9  | 3212  | 2430  |
| 1973 | 88,5  | 56,4  | 3278  | 2090  |
| 1974 | 89,6  | 89,6  | 3387  | 3387  |
| 1975 | 99,6  | 99,6  | 3841  | 3841  |
| 1976 | 110,8 | 110,8 | 4351  | 4351  |
| 1977 | 123,2 | 123,2 | 4927  | 4927  |
| 1978 | 137,0 | 137,0 | 5577  | 5577  |
| 1979 | 152,3 | 152,3 | 6312  | 6312  |
| 1980 | 169,4 | 169,4 | 7141  | 7140  |
| 1981 | 188,3 | 188,3 | 8101  | 8101  |
| 1982 | 209,4 | 209,4 | 9188  | 9187  |
| 1983 | 232,9 | 232,8 | 10416 | 10415 |
| 1984 | 102,8 | 102,8 | 4689  | 4689  |
| 1985 | 92,0  | 92,0  | 4273  | 4273  |
| 1986 | 82,3  | 82,3  | 3909  | 3909  |
| 1987 | 73,6  | 73,6  | 3574  | 3574  |
| 1988 | 65,9  | 65,9  | 3266  | 3266  |
| 1989 | 58,9  | 58,9  | 2984  | 2984  |
| 1990 | 52,7  | 52,7  | 2724  | 2724  |
| 1991 | 47,1  | 47,1  | 2485  | 2485  |
| 1992 | 8,7   | 8,7   | 469   | 470   |
| 1993 | 7,7   | 7,7   | 422   | 422   |
| 1994 | 6,8   | 6,8   | 380   | 380   |
| 1995 | 6,0   | 6,0   | 341   | 341   |
| 1996 | 5,3   | 5,3   | 306   | 306   |
| 1997 | 4,7   | 4,7   | 275   | 275   |
| 1998 | 4,1   | 4,1   | 246   | 246   |
| 1999 | 3,7   | 3,7   | 221   | 221   |
| 2000 | 3,2   | 3,2   | 198   | 198   |
| 2001 | 2,8   | 2,8   | 177   | 177   |
| 2002 | 2,5   | 2,5   | 158   | 158   |
| 2003 | 2,2   | 2,2   | 141   | 141   |
| 2004 | 2,0   | 2,0   | 126   | 126   |
| 2005 | 1,7   | 1,7   | 112   | 112   |
| 2006 | 1,5   | 1,5   | 100   | 100   |
| 2007 | 1,3   | 1,3   | 89    | 89    |
| 2008 | 1,2   | 1,2   | 80    | 80    |
| 2009 | 1,0   | 1,0   | 71    | 71    |
| 2010 | 0,9   | 0,9   | 64    | 64    |

|      |     |     |    |    |
|------|-----|-----|----|----|
| 2011 | 0,8 | 0,8 | 57 | 57 |
| 2012 | 0,7 | 0,7 | 51 | 51 |
